# Supplementary material for: Potential of a novel peptide P16-D from the membrane-proximal external region of human immunodeficiency virus type 1 to enhance retrovirus infection
Source: Royal Society of Chemistry journal article supplement (doi:10.1039/c6ra10424j), 2016-01-01
Supplement: c6ra10424j1.pdf [file c6ra10424j1.pdf]

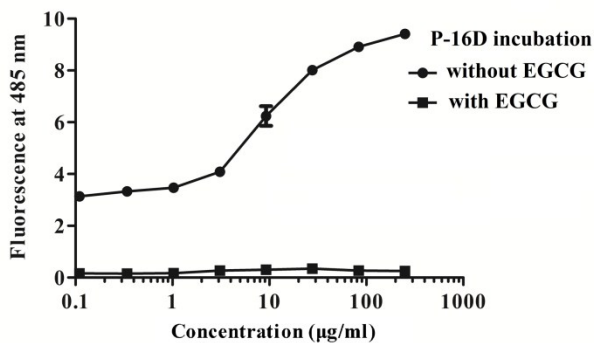

Figure\_S\_1. ThT fluorescence intensity for P-16D in the absence and presence of EGCG.

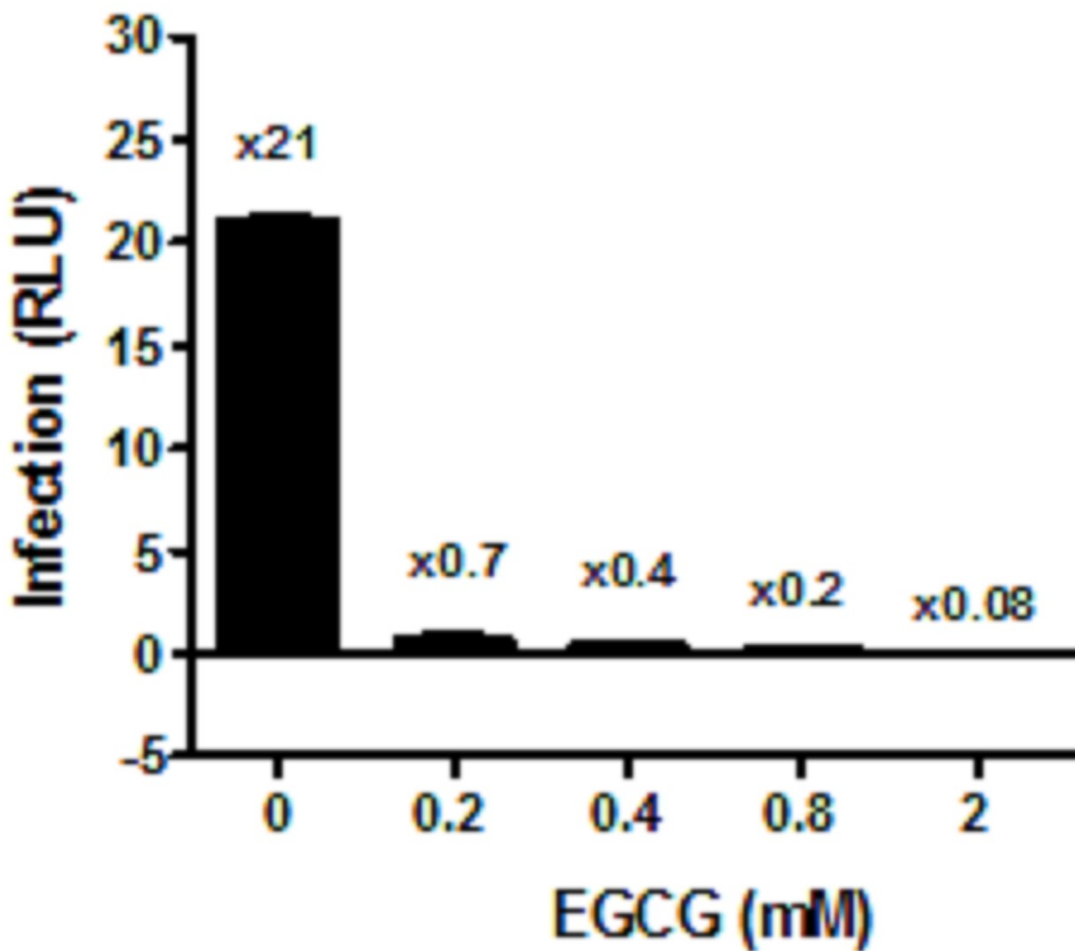

Figure\_S\_2. The promoting infection activity of P-16D nanofibril inhibited by EGCG
